# Supplementary material
Source: publisher figshare collection journal article supplement (https://asha.figshare.com/articles/dataset/_/12291074)
Supplement: Supplementary file 1 [file 1]

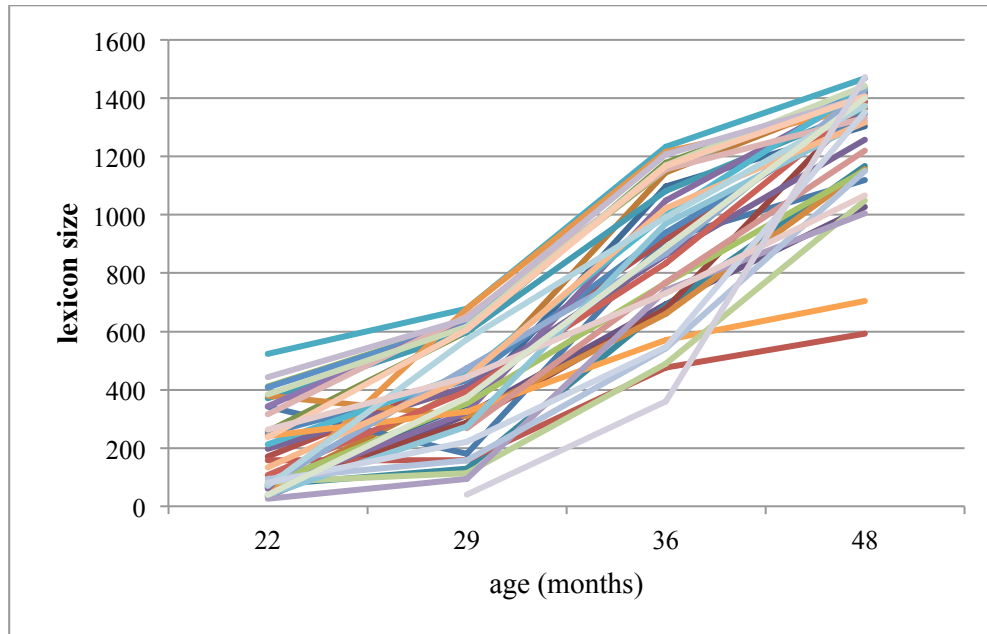

**Figure S1.** Lexicon size across age in 40 French-speaking children.

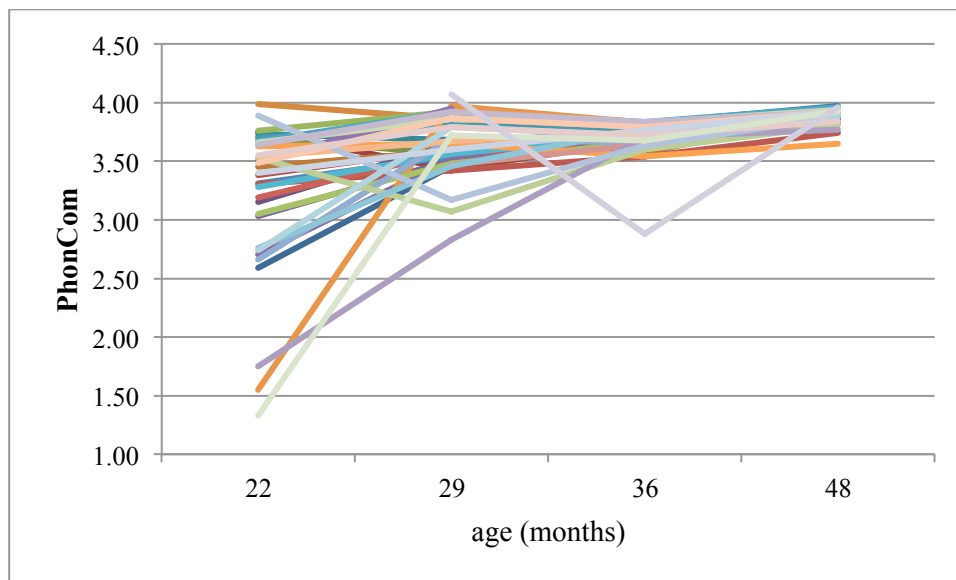

**Figure S2.** Mean phonetic complexity across age in 40 French-speaking children.

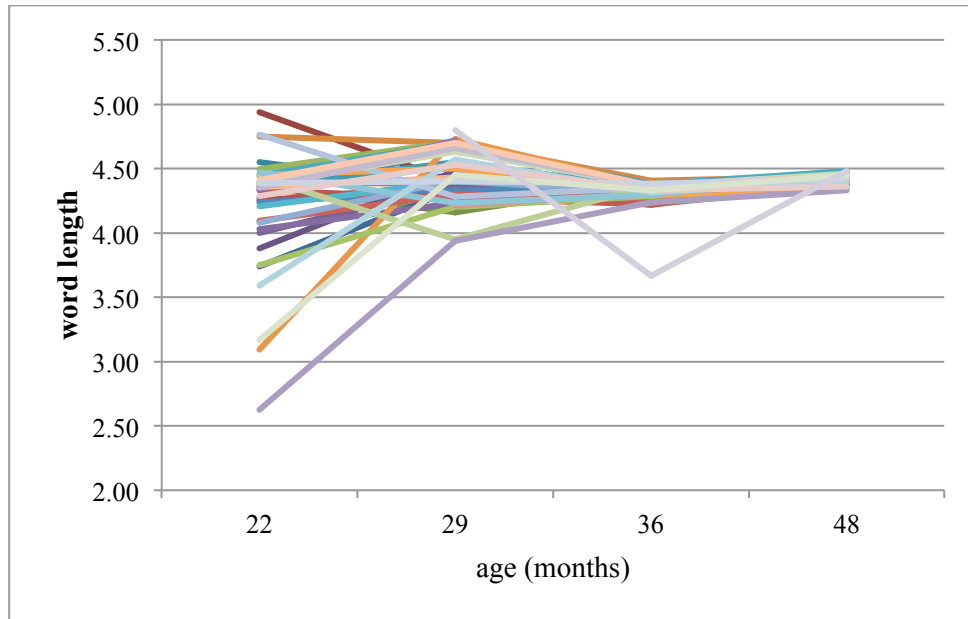

**Figure S3.** Mean word length across age in 40 French-speaking children.

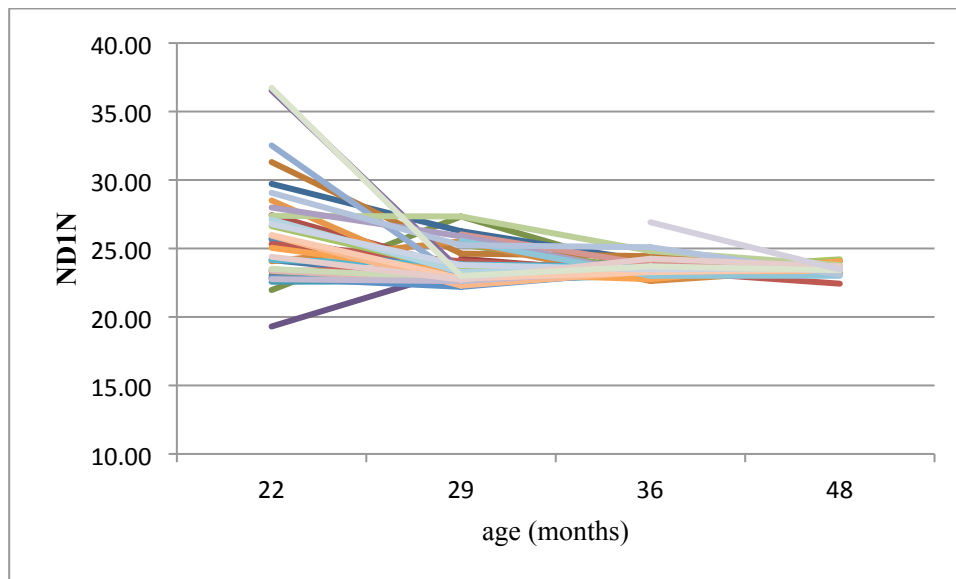

**Figure S4.** Mean neighborhood density of one-syllable nouns across age in 40 French-speaking children.

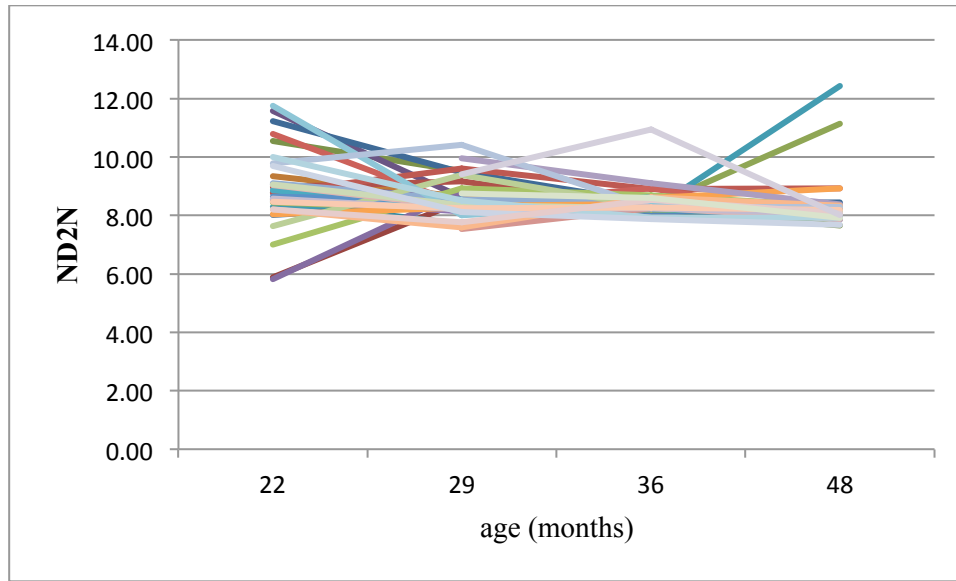

**Figure S5.** Mean neighborhood density of two-syllable nouns across age in 40 French-speaking children.

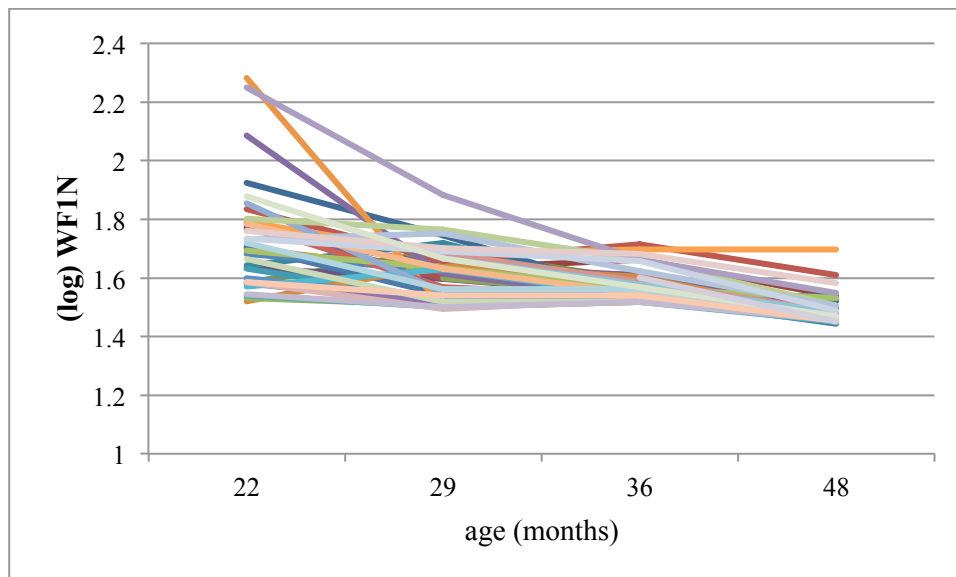

**Figure S6.** Mean (log) word frequency of one-syllable nouns across age in 40 French-speaking children.

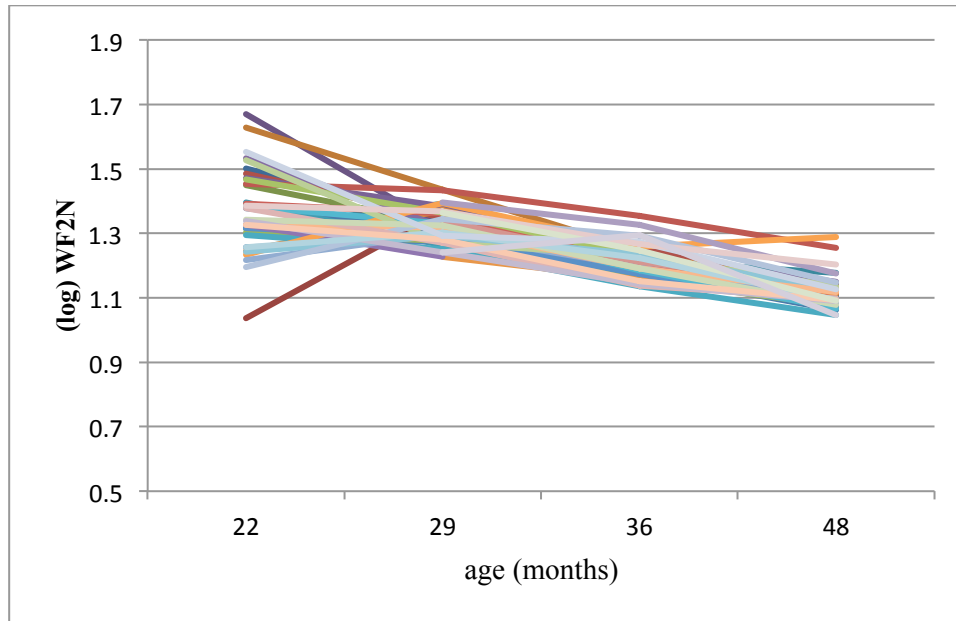

**Figure S7.** Mean (log) word frequency of two-syllable nouns across age in 40 French-speaking children.

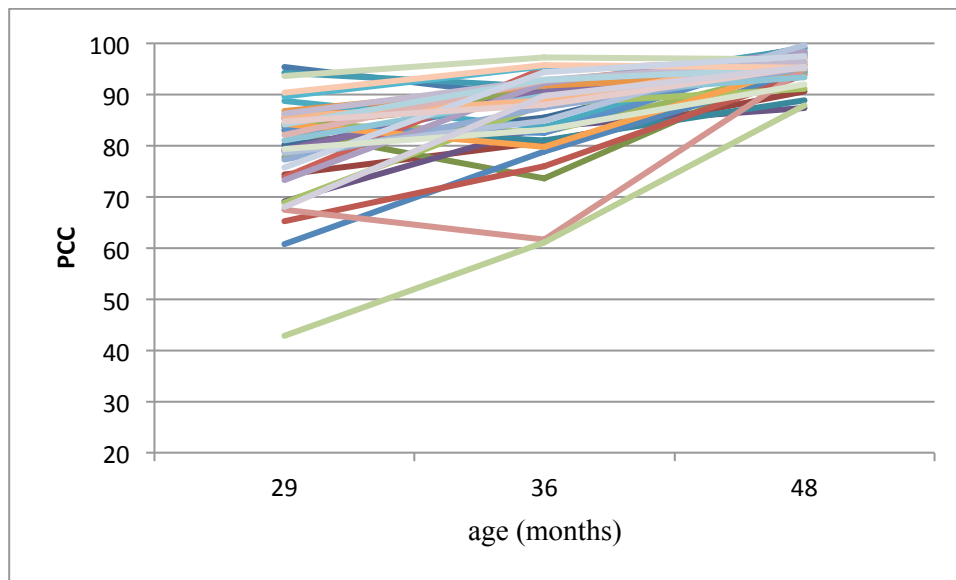

**Figure S8.** Percent consonants correct across age in 40 French-speaking children.

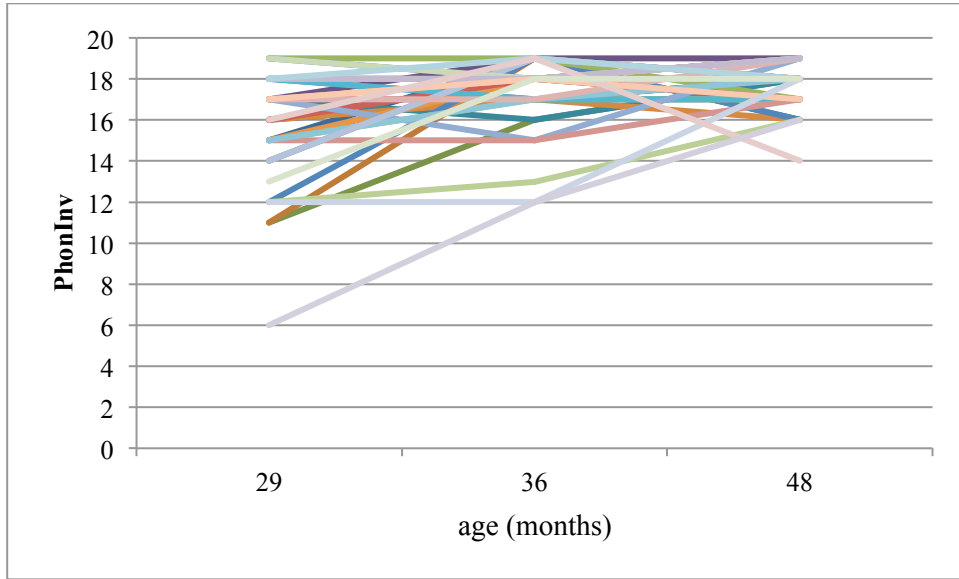

**Figure S9.** Syllable-initial phonetic inventory size across age in 40 French-speaking children.
