# Supplementary material
Source: publisher figshare collection journal article supplement (https://asha.figshare.com/articles/dataset/_/12291074)
Supplement: Supplementary file 2 [file 1]

**Table S1.** Correlation coefficients among dependent and predictor variables at 22 months.

|                     | PhonCom | WL     | ND1N    | ND2N | LWF1N   | LWF2N  |
|---------------------|---------|--------|---------|------|---------|--------|
| IFDC <sub>tot</sub> | .59***  | .45**  | -.59*** | -.20 | -.66*** | -.26   |
| PhonCom             | —       | .90*** | -.63*** | -.28 | -.79*** | -.28   |
| WL                  | —       | —      | -.41*   | -.28 | -.74*** | -.49** |
| ND1N                | —       | —      | —       | -.31 | .62***  | .13    |
| ND2N                | —       | —      | —       | —    | -.16    | .23    |
| LWF1N               | —       | —      | —       | —    | —       | .29    |
| LWF2N               | —       | —      | —       | —    | —       | —      |

\* $p < .05$ . \*\* $p < .01$ . \*\*\* $p < .001$ .

*Note.* IFDC<sub>tot</sub> = total vocabulary score on the l’Inventaire Français du Développement Communicatif (Kern & Gayraud, 2010; the French version of the MacArthur–Bates Communicative Development Inventories [MCDI; Fenson et al., 1993]); PhonCom = phonetic complexity; WL = word length; ND1N = neighborhood density of one-syllable nouns; ND2N = neighborhood density of two-syllable nouns; LWF1N = log-transformed word frequency of one-syllable nouns; LWF2N = log-transformed word frequency of two-syllable nouns.

**Table S2.** Correlation coefficients among dependent and predictor variables at 29 months.

|                     | PhonCom | WL     | ND1N    | ND2N    | LWF1N   | LWF2N  | PCC    | PhonInv |
|---------------------|---------|--------|---------|---------|---------|--------|--------|---------|
| IFDC <sub>tot</sub> | .67***  | .69*** | -.77*** | -.52**  | -.89*** | -.52** | .62*** | .69***  |
| PhonCom             | —       | .93*** | -.71*** | -.54*** | -.51**  | -.51** | .58*** | .24     |
| WL                  | —       | —      | -.71*** | -.42**  | -.79*** | -.49** | .60*** | .29     |
| ND1N                | —       | —      | —       | .53**   | .71**   | .32*   | -.48** | -.59*** |
| ND2N                | —       | —      | —       | —       | .47**   | .23    | -.35*  | -.37*   |
| LWF1N               | —       | —      | —       | —       | —       | .59*** | -.49** | -.54*** |
| LWF2N               | —       | —      | —       | —       | —       | —      | -.12   | -.06    |
| PCC                 | —       | —      | —       | —       | —       | —      | —      | .50**   |
| PhonInv             | —       | —      | —       | —       | —       | —      | —      | —       |

\* $p < .05$ . \*\* $p < .01$ . \*\*\* $p < .001$ .

*Note.* IFDC<sub>tot</sub> = total vocabulary score on the l’Inventaire Français du Développement Communicatif (Kern & Gayraud, 2010; the French version of the MacArthur–Bates Communicative Development Inventories [MCIDI; Fenson et al., 1993]); PhonCom = phonetic complexity; WL = word length; ND1N = neighborhood density of one-syllable nouns; ND2N = neighborhood density of two-syllable nouns; LWF1N = log-transformed word frequency of one-syllable nouns; LWF2N = log-transformed word frequency of two-syllable nouns; PCC = percent consonants correct; PhonInv = syllable-initial consonant inventory size.

**Table S3.** Correlation coefficients among dependent and predictor variables at 36 months.

|                      | PhonCom | WL     | ND1N    | ND2N    | LWF1N   | LWF2N   | PCC   | PhonInv |
|----------------------|---------|--------|---------|---------|---------|---------|-------|---------|
| DLPF3 <sub>tot</sub> | .67***  | .45**  | -.44**  | -.45**  | -.83*** | -.81*** | .35*  | .42**   |
| PhonCom              | —       | .93*** | -.76*** | -.85*** | -.38*   | -.53**  | .15   | .44**   |
| WL                   | —       | —      | -.69*** | -.91*** | -.20    | -.43**  | -.06  | .36*    |
| ND1N                 | —       | —      | —       | .59***  | .13     | .26     | -.18  | -.40*   |
| ND2N                 | —       | —      | —       | —       | .22     | .44**   | .07   | -.33    |
| LWF1N                | —       | —      | —       | —       | —       | .84***  | -.36* | -.19    |
| LWF2N                | —       | —      | —       | —       | —       | —       | .12   | -.15    |
| PCC                  | —       | —      | —       | —       | —       | —       | —     | .25     |
| PhonInv              | —       | —      | —       | —       | —       | —       | —     | —       |

\* $p < .05$ . \*\* $p < .01$ . \*\*\* $p < .001$ .

*Note.* DLPF3<sub>tot</sub> = total vocabulary score on the Developpement du Langage de Production en Français Version 3 (Bassano et al., 2005); PhonCom = phonetic complexity; WL = word length; ND1N = neighborhood density of one-syllable nouns; ND2N = neighborhood density of two-syllable nouns; LWF1N = log-transformed word frequency of one-syllable nouns; LWF2N = log-transformed word frequency of two-syllable nouns; PCC = percent consonants correct; PhonInv = syllable-initial consonant inventory size.

**Table S4.** Correlation coefficients among dependent and predictor variables at 48 months.

|                      | PhonCom | WL     | ND1N | ND2N   | LWF1N   | LWF2N   | PCC  | PhonInv |
|----------------------|---------|--------|------|--------|---------|---------|------|---------|
| DLPF4 <sub>tot</sub> | .90***  | .72*** | .15  | -.08   | -.89*** | -.93*** | .16  | .11     |
| PhonCom              | —       | .86*** | .06  | -.15   | -.89*** | -.91*** | .14  | .05     |
| WL                   | —       | —      | .07  | -.06   | -.74*** | -.81*** | .04  | .07     |
| ND1N                 | —       | —      | —    | .91*** | -.11    | -.14    | .16  | .13     |
| ND2N                 | —       | —      | —    | —      | .08     | .08     | .20  | .19     |
| LWF1N                | —       | —      | —    | —      | —       | .93***  | -.19 | -.12    |
| LWF2N                | —       | —      | —    | —      | —       | —       | .13  | -.08    |
| PCC                  | —       | —      | —    | —      | —       | —       | —    | .06     |
| PhonInv              | —       | —      | —    | —      | —       | —       | —    | —       |

\* $p < .05$ . \*\* $p < .01$ . \*\*\* $p < .001$ .

*Note.* DLPF4<sub>tot</sub> = total vocabulary score on the *Developpement du Langage de Production en Français Version 4* (Bassano et al., 2005); PhonCom = phonetic complexity; WL = word length; ND1N = neighborhood density of one-syllable nouns; ND2N = neighborhood density of two-syllable nouns; LWF1N = log-transformed word frequency of one-syllable nouns; LWF2N = log-transformed word frequency of two-syllable nouns; PCC = percent consonants correct; PhonInv = syllable-initial consonant inventory size.

**Table S5.** Correlation coefficients among predictor variables at ages 22 and 29 months and vocabulary size at 36 and 48 months (i.e., DLPF3<sub>tot</sub> & DLPF4<sub>tot</sub>).

|                                                                 | PhonCom | WL    | ND1N    | ND2N   | LWF1N   | LWF2N   | PCC    | PhonInv |
|-----------------------------------------------------------------|---------|-------|---------|--------|---------|---------|--------|---------|
| Predicting vocabulary size at 36 months (DLPF3 <sub>tot</sub> ) |         |       |         |        |         |         |        |         |
| 22 months                                                       | -.11    | -.17  | -.21    | .10    | -.17    | -.03    | —      | —       |
| 29 months                                                       | .47**   | .45** | -.57*** | -.43** | -.70*** | -.46**  | .57*** | .65***  |
| Predicting vocabulary size at 48 months (DLPF4 <sub>tot</sub> ) |         |       |         |        |         |         |        |         |
| 22 months                                                       | -.10    | -.09  | .04     | .22    | -.27    | .13     | —      | —       |
| 29 months                                                       | .51**   | .45** | -.36*   | -.28   | -.60*** | -.61*** | .37*   | .09     |

\* $p < .05$ . \*\* $p < .01$ . \*\*\* $p < .001$ .

*Note.* DLPF3<sub>tot</sub> = total vocabulary score on the *Developpement du Langage de Production en Français Version 3* (Bassano et al., 2005); DLPF4<sub>tot</sub> = total vocabulary score on the *Developpement du Langage de Production en Français Version 4* (Bassano et al., 2005); PhonCom = phonetic complexity; WL = word length; ND1N = neighborhood density of one-syllable nouns; ND2N = neighborhood density of two-syllable nouns; LWF1N = log-transformed word frequency of one-syllable nouns; LWF2N = log-transformed word frequency of two-syllable nouns; PCC = percent consonants correct; PhonInv = syllable-initial consonant inventory size.

## References

Bassano, D., Labrell, F., Champaud, C., Lemétayer, F., & Bonnet, P. (2005). Le DLPF: Un nouvel outil pour l'évaluation du Développement du Langage de Production en Français [The DLPF: A new tool for assessing the development of language production in French]. *Enfance*, *57*, 171–208. <https://www.cairn.info/revue-enfance1-2005-2-page-171.htm>

Fenson, L., Dale, P., Reznick, S., Thal, D., Bates, E., Hartung, J., Pethick, S., & Reilly, J. (1993). *MacArthur Communicative Development Inventories: User's guide and technical manual*. Singular.

Kern, S., & Gayraud, F. (2010). *L'inventaire Français du Développement Communicatif* [The French Inventory of Communicative Development]. Editions La Cigale.
